# Supplementary figures and images for: High-speed microparticle isolation unlimited by Poisson statistics
Source: Royal Society of Chemistry journal article supplement (doi:10.1039/c9lc00324j), 2019-01-01

(a)

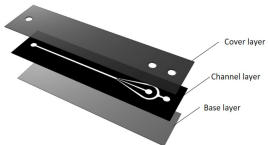

(b)

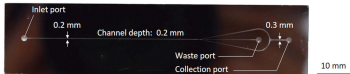

Supplement: c9lc00324j2.pdf [file c9lc00324j2.pdf]

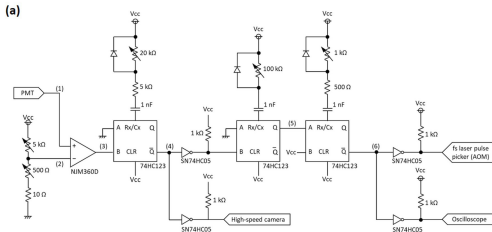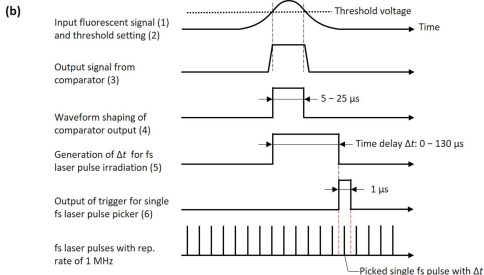

Supplement: c9lc00324j3.pdf [file c9lc00324j3.pdf]
